# Supplementary material for: Feasibility of polyethylene composites reinforced by distillers dried fibers with solubles (DDFS) after different generations of ethanol fermentation
Source: Royal Society of Chemistry journal article supplement (doi:10.1039/c8ra03906b), 2018-01-01

## Supplemental Information

Feasibility of polyethylene composites reinforced by distillers dried fibers with  
soluble (DDFS) after different generations of ethanol fermentation

Bo Chen<sup>a</sup>, Xiaotong Shen<sup>a</sup>, Zhangfeng Luo<sup>a</sup>, Huidong Chen<sup>b,c</sup>, Di Cai<sup>a\*</sup>, Changjing  
Chen<sup>a</sup>, Changwei Zhang<sup>a</sup>, Peiyong Qin<sup>a</sup>, Hui Cao<sup>a\*</sup>, Tianwei Tan<sup>a</sup>

\* Corresponding authors

Address: No.15 Beisanhuan East Road, Chaoyang District, Beijing, 100029.

Email: caidibuct@163.com; caohui@mail.buct.edu.cn

<sup>a</sup> National Energy R&D Center for Biorefinery, Beijing University of Chemical  
Technology, Beijing 100029, PR China

<sup>b</sup> College of Chemical Engineering, Beijing University of Chemical Technology,  
Beijing 100029, PR China

<sup>c</sup> Center for Process Simulation & Optimization, Beijing University of Chemical  
Technology, Beijing 100029, PR China

## Figure captions

Fig.S1 Comparison of the reinforcing DDFSs properties. (a) FT-IR; (b) XRD.

Fig.S2 TGA thermograms of the DDFSs reinforced polyethylene composites (a) TG curves; (b) DTG curves.

Fig.S3 The melting point temperatures and the crystallization peak temperatures of the DDFS reinforced polyethylene composites. (a) The melting point temperatures; (b) Crystallization peak temperatures.

Fig.S4 SEM images of the DDFS reinforced polyethylene composites before weathering.

Fig.S5 SEM images of the DDFS reinforced polyethylene composites after weathering.

Fig.S1

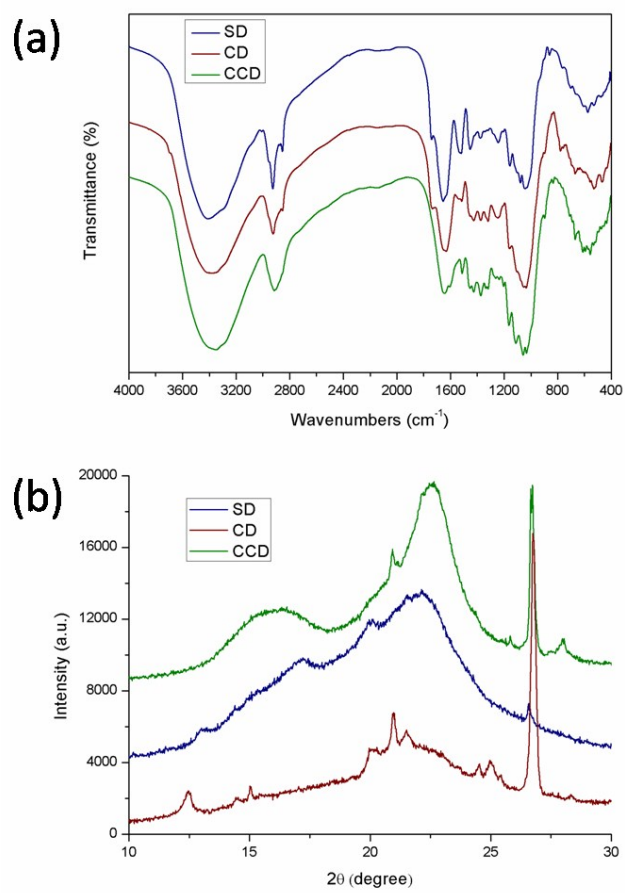

Fig.S2

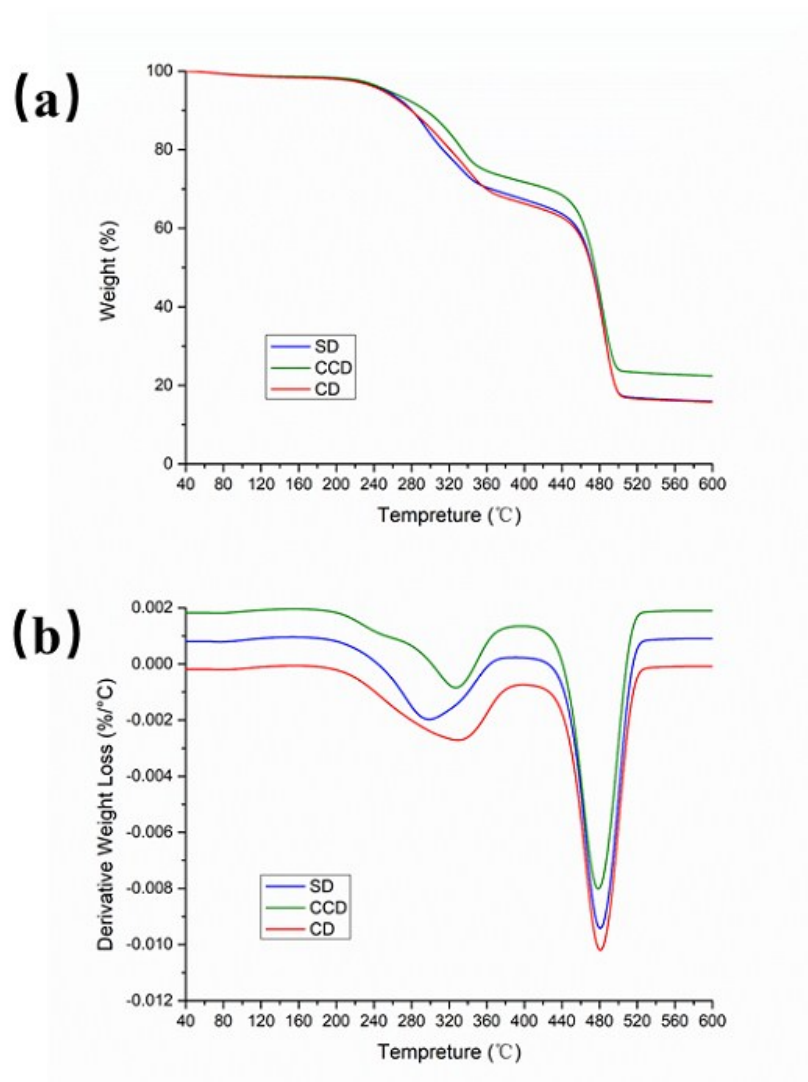

Fig.S3

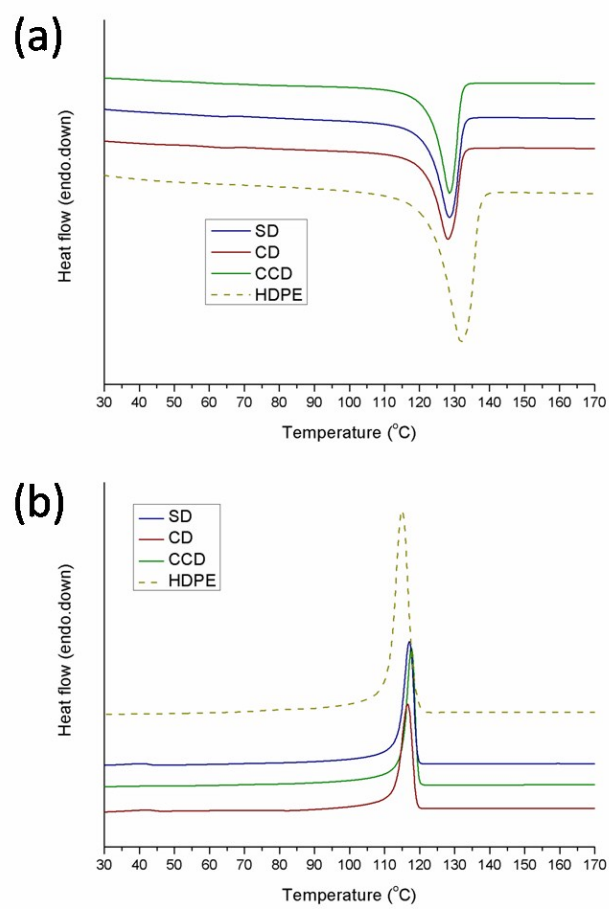

Fig.S4

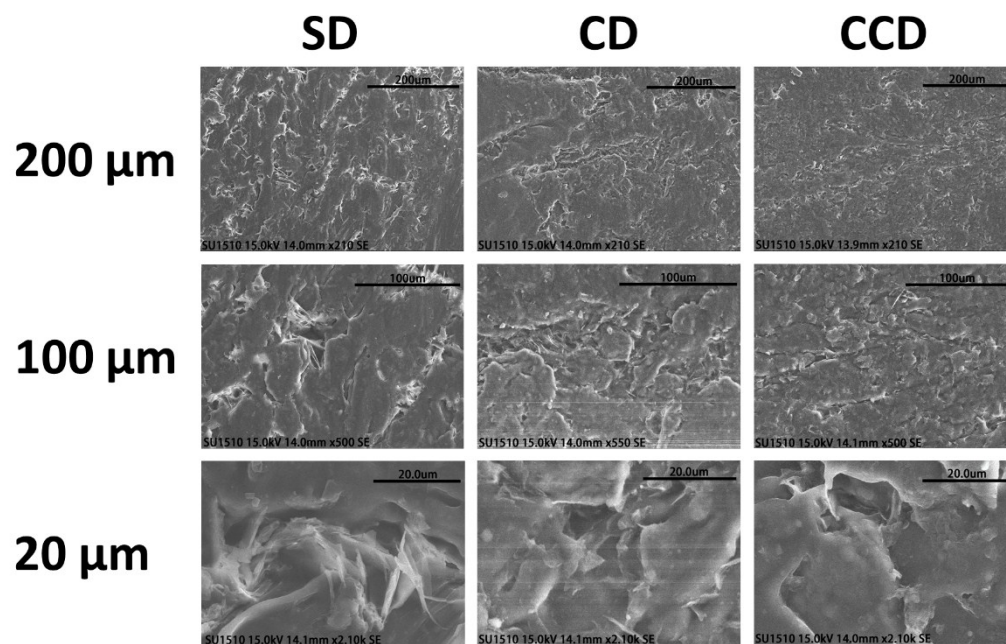

Fig.S5

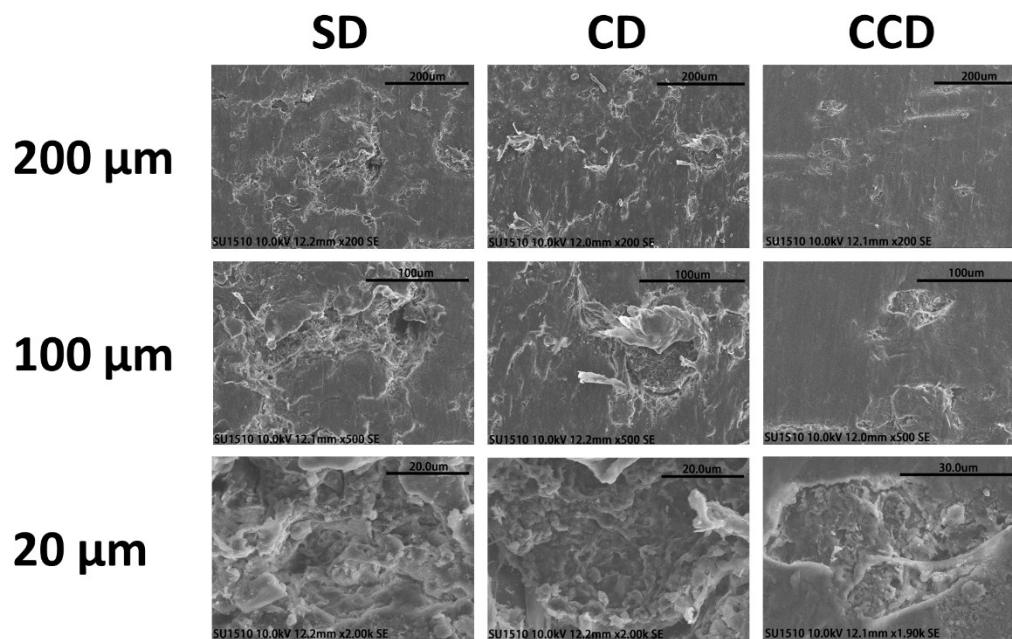

Supplement: c8ra03906b1.pdf [file c8ra03906b1.pdf]
